# Supplementary material for: Mucuna pruriens extract as Prebiotic and Lactobacillus rhamnosus as Probiotic Intervention mitigated histological changes in DNCB-Induced Colitis via GLP-1/Nrf2/NF-κβ Axis Regulation
Source: Research Square preprint supplement (doi:10.21203/rs.3.rs-8247204/v1), 2025-12-03
Supplement: Supplementary file 1 [file 59e26d168ab7d17b0f2083bf.docx]

**Supplementary table list**

**Supplementary Table 1.** LC-FTMS-ESI-MS data of *Mucuna pruriens* extract in both negative and positive mode with possible molecular formulae.

| S.No. | Name | RT | Molecular formula | Mean measured mass (Da) m/z | Mass (Da) | Diff(Tgt, ppm) | Ionisation Mode |
| --- | --- | --- | --- | --- | --- | --- | --- |
|  | N-Acetylneuraminic acid | 0.718 | C11 H19 N O9 | 292.1028 | 309.1061 | 0.53 | [M+H-H2O]+1 |
|  | Methyl 4-{4-[3-(1,3-benzodioxol-5-yl)-1,2,4-oxadiazol-5-yl]-5-methyl-1H-1,2,3-triazol-1-yl} benzoate | 2.488 | C20 H15 N5 O5 | 406.113 | 405.1057 | -4 | [M+H]+1 |
|  | 1-(2-Methylphenyl)-3-[3-(4-phenyl-1-piperazinyl)propyl]urea | 8.378 | C21 H28 N4 O | 351.2178 | 352.2251 | -3.49 | [M-H]-1 |
|  | Ro 20-1724 | 2.631 | C15 H22 N2 O3 | 279.1701 | 278.1629 | -0.65 | [M+H]+1 |
|  | Dehydrophytosphingosine | 11.308 | C18 H37 N O3 | 316.2844 | 315.2772 | -0.62 | [M+H]+1 |
|  | 5alpha-androst-16-en-3-one | 12.113 | C19 H28 O | 255.2107 | 272.214 | -0.24 | [M+H-H2O]+1 |
|  | Maritimetin 6- (6"-p-coumarylglucoside) | 13.185 | C30 H26 O13 | 593.1306 | 594.1379 | 0.93 | [M-H]-1 |
|  | 12-Oxo-20-carboxy-leukotriene B4 | 16.592 | C20 H28 O6 | 363.1815 | 364.1888 | 0.48 | [M-H]-1 |
|  | Dinoseb | 17.304 | C10 H12 N2 O5 | 239.0674 | 240.0747 | 0.35 | [M-H]-1 |
|  | Methyl ({(2S)-2-[(3S,9S,10R,13S,14S,17R)-3-acetoxy-10,13-dimethyl-2,3,4,7,8,9,10,11,12,13,14,15,16,17-tetradecahydro-1H-cyclopenta[a]phenanthren-17-yl]propanoyl}amino)acetate | 21.221 | C27 H41 N O5 | 458.2914 | 459.2985 | -0.01 | [M-H]-1 |
|  | Cer(d18:0/16:0) | 23.727 | C34 H69 N O3 | 540.5345 | 539.5272 | -0.94 | [M+H]+1 |
|  | bis(4-Octylphenyl)amine | 30.878 | C28 H43 N | 394.3464 | 393.3392 | -1.03 | [M+H]+1 |
|  | 2,2-Dichloro-1,1-ethanediol | 38.096 | C2 H4 Cl2 O2 | 171.993 | 129.9592 | 2.44 | [M+ACN+H]+1 |
|  | 4-phenolsulfonic acid | 39.506 | C6 H6 O4 S | 172.9914 | 173.9987 | -0.14 | [M-H]-1 |
|  | Methyl 4-{4-[3-(1,3-benzodioxol-5-yl)-1,2,4-oxadiazol-5-yl]-5-methyl-1H-1,2,3-triazol-1-yl}benzoate | 2.488 | C20 H15 N5 O5 | 406.113 | 405.1057 | -4 | [M+H]+1 |
|  | 1,3-Dihydroxy-2-propanyl 6-O-(3-methylbutanoyl)-beta-D-galactopyranoside | 2.442 | C14 H26 O9 | 337.1506 | 338.1579 | 0.52 | [M-H]-1 |
|  | Emmotin A | 0.688 | C16 H22 O4 | 279.1589 | 278.1517 | -0.54 | [M+H]+1 |
|  | N~2~-(Diphenylacetyl)-N-(4-hydroxybenzyl)-N~5~-(N-{4-[4-(hydroxymethyl)-1H-1,2,3-triazol-1-yl]butanoyl}carbamimidoyl)-D-ornithinamide | 13.266 | C34 H40 N8 O5 | 639.3025 | 640.3098 | -3.75 | [M-H]-1 |
|  | cis-5-{[(4-{[3-(4-Piperidinyl)propyl]carbamoyl}-1-piperazinyl)carbonyl]oxy}cyclooctyl 4-[(4-carbamimidamidobenzyl)carbamoyl]-1-piperazinecarboxylate | 1.109 | C36 H58 N10 O6 | 727.4592 | 726.452 | -2.93 | [M+H]+1 |
|  | 9,10-dihydroxy-2-decenoic acid | 7.721 | C10 H18 O4 | 201.1133 | 202.1205 | 0.17 | [M-H]-1 |
|  | 7-Chloro-N-{5-[(5-methyl-5H-[1,2,4]triazino[5,6-b]indol-3-yl)sulfanyl]pentyl}-4-quinolinamine | 8.577 | C24 H23 Cl N6 S | 461.1328 | 462.1405 | 2.4 | [M-H]-1 |
|  | N,N'-Bis[2-(2-isopropyl-5-methylphenoxy)ethyl]-N,N,N',N'-tetramethyl-1,10-decanediaminium | 9.781 | C38 H66 N2 O2 | 583.5165 | 582.5093 | -5.47 | [M+H]+1 |
|  | (1R,2S,3r,4R,5S,6s)-6-{[(1-Undecyl-1H-1,2,3-triazol-4-yl)methyl]amino}-1,2,3,4,5-cyclohexanepentol | 12.086 | C20 H38 N4 O5 | 415.293 | 414.2857 | 3.55 | [M+H]+1 |
|  | N-[2-(Diethylamino)ethyl]-3-[(methylsulfanyl)methyl]benzenesulfonamide | 16.746 | C14 H24 N2 O2 S2 | 317.1357 | 316.1285 | 1.73 | [M+H]+1 |
|  | 2,2-Dimethyl-3-oxo-N-(2,4,6-trimethoxyphenyl)tetradecanamide | 22.392 | C25 H41 N O5 | 434.2913 | 435.2983 | -0.34 | [M-H]-1 |
|  | 2-methyl-16-heptadecenoic acid | 26.002 | C18 H34 O2 | 283.263 | 282.2557 | -0.66 | [M+H]+1 |
|  | 2-(Methylamino)-2-oxoethyl {2-[1-(6-methyl-2-pyridinyl)-4 piperidinyl]ethyl}carbamate | 2.428 | C17 H26 N4 O3 | 333.192 | 334.1993 | -3.51 | [M-H]-1 |
|  | Thymidine | 3.95 | C10 H14 N2 O5 | 243.0974 | 242.0902 | -0.46 | [M+H]+1 |
|  | Sulfuretin | 3.328 | C15 H10 O5 | 271.0601 | 270.0528 | -0.04 | [M+H]+1 |
|  | Palmitic acid | 1.856 | C16 H32 O2 | 255.233 | 256.2403 | 0.19 | [M-H]-1 |
|  | Linoleic Acid | 24.63 | C18 H32 O2 | 279.233 | 280.2403 | 0.06 | [M-H]-1 |
|  | Quercetin 3- (2"-p-hydroxybenzoyl-4"-p coumarylrhamnoside) | 0.248 | C37 H30 O15 | 713.1483 | 714.1555 | -4.12 | [M-H]-1 |
|  | Levodopa | 0.125 | C9 H11 N O4 | 196.0615 | 197.0688 | -0.25 | [M-H]-1 |
|  | Palasitrin | 4.382 | C27 H30 O15 | 593.1514 | 594.1587 | 0.35 | [M-H]-1 |
|  | Leptosidin 6-xylosyl- (1->4) -arabinoside | 7.706 | C26 H28 O14 | 563.1409 | 564.148 | 0.12 | [M-H]-1 |
|  | Maritimein | 5.869 | C21 H20 O11 | 447.0934 | 448.1007 | 0.29 | [M-H]-1 |
|  | Sulfurein | 5.167 | C21 H20 O10 | 433.1127 | 432.1056 | -0.14 | [M+H]+1 |
|  | Benzoic acid, 4-(beta-D-glucopyranosyloxy) | 2.576 | C13 H16 O8 | 299.0773 | 300.0846 | 0.27 | [M-H]-1 |
|  | N-Acetyl-L-tyrosine | 0.051 | C11 H13 N O4 | 242.1023 | 241.0949 | 2.79 | [M+H]+1 |
|  | 3-Isoquinolinecarboxylic acid, 1,2,3,4-tetrahydro-6,7-dihydroxy-1- methyl-, (1S,3S) | 0.231 | C11 H13 N O4 | 224.0917 | 223.0845 | 0.01 | [M+H]+1 |
|  | L-Tryptophan, 5-hydroxy | 0.077 | C11 H12 N2 O3 | 221.0919 | 220.0846 | -0.96 | [M+H]+1 |
|  | L-Tyrosine, 3-hydroxy-alpha-methyl | 1.429 | C10 H13 N O4 | 212.0918 | 211.0845 | 0.15 | [M+H]+1 |
|  | L-Tyrosine methyl ester | 14.469 | C10 H13 N O3 | 194.0822 | 195.0895 | -0.27 | [M-H]-1 |

**Supplementary Table 1.** LC-FTMS-ESI-MS data of *Mucuna pruriens* extract in both negative and positive mode with possible molecular formulae.
